# Supplementary material for: Exceptional dielectric and varistor properties of Sr, Zn and Sn co-doped calcium copper titanate ceramics
Source: Royal Society of Chemistry journal article supplement (doi:10.1039/d3ra00743j), 2023-01-01
Supplement: d3ra00743j1.pdf [file d3ra00743j1.pdf]

## Supplementary Information

### Exceptional Dielectric and Varistor Properties of Sr, Zn and Sn Co-doped Calcium Copper Titanate Ceramics

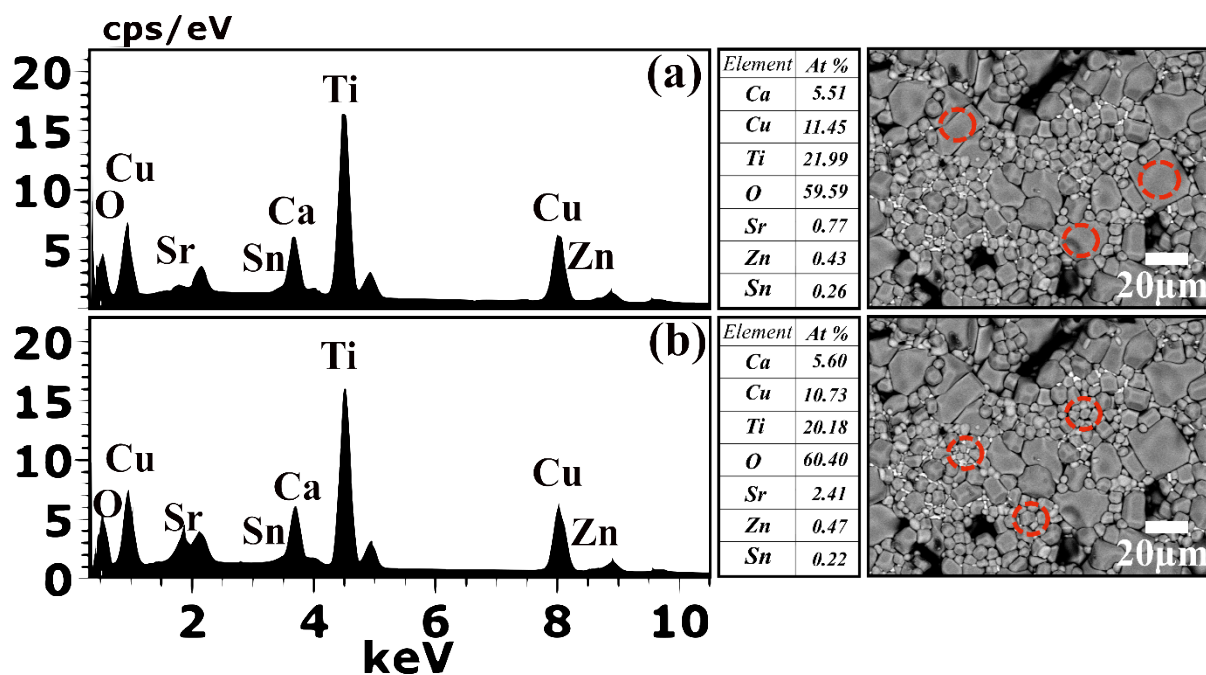

**Fig. S1** EDS spectra of SZS1 ceramics obtained at (a) bigger grains, (b) smaller grain regions. The marked regions in SEM images correspond to EDS spectra recorded and At% of the corresponding elements presented here.

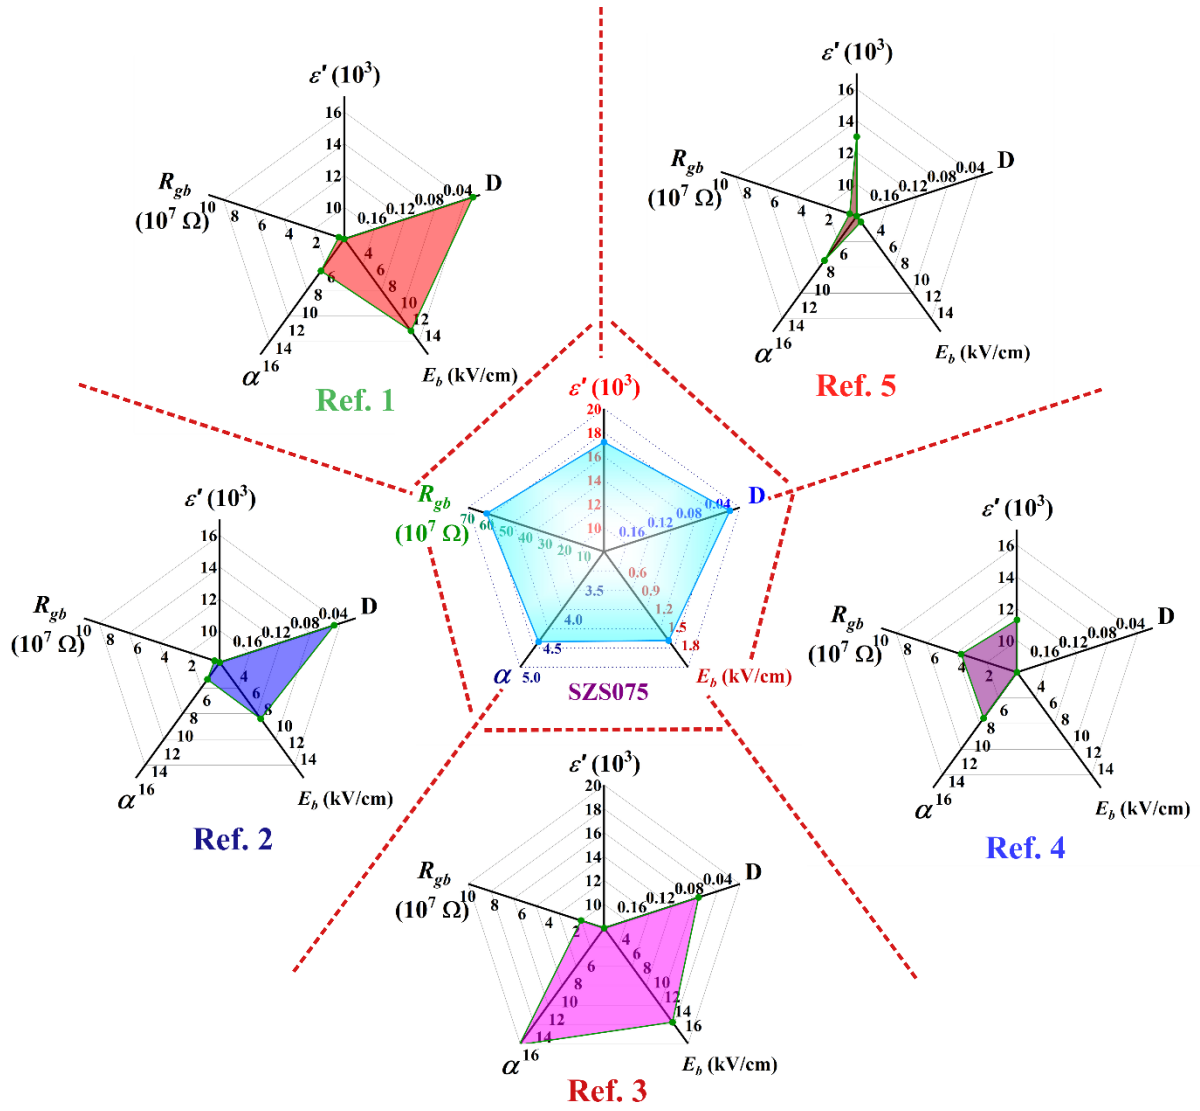

Fig. S2 Radar charts generated based on the recent literature and current experimental data SZS075.

Table S1. Dielectric constant, Dielectric loss and non-linear coefficient values of the present work and CCTO related materials reported recently.

| Reference                | $\epsilon'$ | $D(1\text{kHz})$ | $R_{gb}(\Omega)$   | $\alpha$ | $E_b(\text{kV/cm})$ |
|--------------------------|-------------|------------------|--------------------|----------|---------------------|
| Ref. 1                   | 3000        | 0.02             | $4.0 \times 10^6$  | 6.59     | 12.13               |
| Ref. 2                   | 4020        | 0.04             | $3.8 \times 10^6$  | 4.91     | 7.83                |
| Ref. 3                   | 2000        | 0.068            | $1.7 \times 10^7$  | 16.11    | 14.03               |
| Ref. 4                   | 11352       | 0.2              | $4.1 \times 10^7$  | 8.16     | 1.0                 |
| Ref. 5                   | 13000       | 0.1              | $5.2 \times 10^6$  | 8        | 1.7                 |
| Present work<br>(SZS075) | 17100       | 0.024            | $6.05 \times 10^8$ | 4.56     | 1.56                |

## References

- (1) C. Xu, X. Zhao, L. Ren, J. Sun, L. Yang, J. Guo and R. Liao, *J. Alloys Compd.* 2019, **792**, 1079–1087.
- (2) L. Ren, L. Yang, C. Xu, X. Zhao and R. Liao, *J. Alloys Compd.* 2018, **768**, 652–658.
- (3) P. Mao, J. Wang, L. He, L. Zhang, A. Annadi, F. Kang, Q. Sun, Z. Wang and H. Gong, *ACS Appl. Mater. Interfaces*, 2020, **12**, 48781–48793.
- (4) E. C. Grzebielucka, J. F. Leandro Monteiro, E. C. de Souza, C. P. Ferreira Borges, A. V. de Andrade, E. Cordoncillo, H. Beltrán-Mir and S. R. Antunes, *J. Mater. Sci. & Technology*, 2020, **41**, 12–20.
- (5) S. Rhouma, A. Megriche, M. El Amrani, S. Said, S. Roger and C. Autret-Lambert, *J. Mater. Sci. Mater. Electron.* 2022, **33**, 4535–4549.
